# Supplementary material
Source: PubMed Central journal article supplement (PMC8922062)
Supplement: 41390_2022_1999_MOESM1_ESM.pdf [file 41390_2022_1999_MOESM1_ESM.pdf]

Supplementary Figure 1.

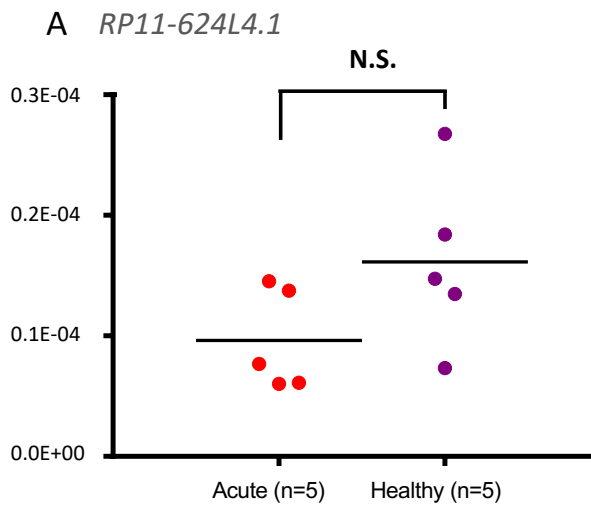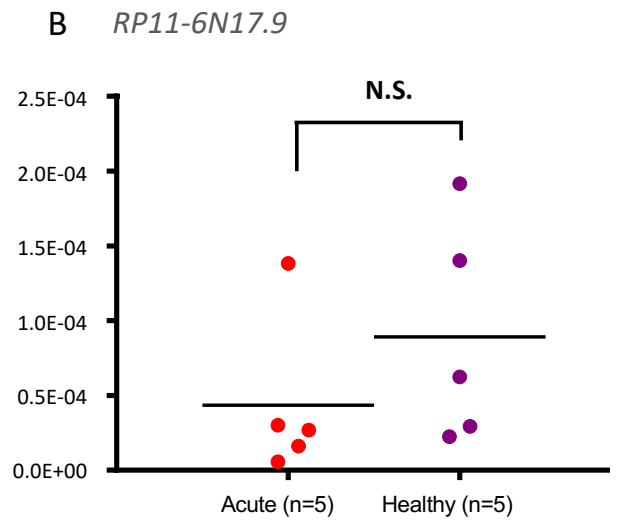

Supplementary Table 1. Clinical characteristics of cases subjected to CAGE-seq  
 KD; Kawasaki disease, HC; Healthy control, Res; IVIG responder, Non-Res; IVIG non-responder, M; male, F; female, RCA; right coronary artery, LCA; left coronary artery

|                                        | KD<br>Res 1 | KD<br>Res 2 | KD<br>Res 3 | KD<br>Non-Res 1 | KD<br>Non-Res 2 | KD<br>Non-Res 3 | HC 1 | HC 2 | HC 3 |
|----------------------------------------|-------------|-------------|-------------|-----------------|-----------------|-----------------|------|------|------|
| Age (month)                            | 36          | 24          | 25          | 5               | 65              | 42              | 8    | 37   | 26   |
| Sex                                    | M           | F           | F           | F               | M               | F               | M    | M    | M    |
| Fever duration (days)                  | 5           | 5           | 5           | 8               | 8               | 8               | -    | -    | -    |
| CRP (mg/dL)                            | 4.87        | 4.85        | 4.5         | 5.5             | 7.5             | 7.9             | 0.2  | 0.1  | 0.1  |
| WBC (/mm <sup>3</sup> )                | 13520       | 14200       | 12370       | 18000           | 18930           | 12780           | 8200 | 6900 | 7600 |
| Neutrophils (%)                        | 58.6        | 70.2        | 65.0        | 74.4            | 88.9            | 77.0            | 40.3 | 44.0 | 42.3 |
| Platelet ( $\times 10^4/\text{mm}^3$ ) | 46.2        | 35.1        | 37.3        | 35.1            | 26.9            | 45.7            | 31.0 | 27.5 | 24.0 |
| Na (mmol/L)                            | 137         | 133         | 134         | 133             | 138             | 137             | 137  | 136  | 136  |
| AST (IU/L)                             | 29          | 43          | 23          | 43              | 37              | 60              | 42   | 26   | 31.2 |
| Maximum RCA (#1) (mm)                  | 1.9         | 1.9         | 1.9         | 1.7             | 2.2             | 2.1             | -    | -    | -    |
| Maximum LCA (#5) (mm)                  | 2.2         | 2.3         | 2.1         | 1.7             | 2.4             | 2.2             | -    | -    | -    |

Supplementary Table 2. Genes contained in each GO term

| Ontology                                          | Term                                                                                                                                                                                                                                                                                                      | feature names                                                                                                                                                                                                                                                                                                                                                                                                                                                                                                                                                                                                                                                     |
|---------------------------------------------------|-----------------------------------------------------------------------------------------------------------------------------------------------------------------------------------------------------------------------------------------------------------------------------------------------------------|-------------------------------------------------------------------------------------------------------------------------------------------------------------------------------------------------------------------------------------------------------------------------------------------------------------------------------------------------------------------------------------------------------------------------------------------------------------------------------------------------------------------------------------------------------------------------------------------------------------------------------------------------------------------|
| BP                                                | Immune system process                                                                                                                                                                                                                                                                                     | CLU,HP,EDNRB,CD177,CST7,HDAC9,ANXA3,IL1R2,JUP,PDE4B,PPBP,GPR97,SAMSN1,CR1,MYL9,THBS1,NAMPT,LRG1,TREML1,GRAP2,IL1RAP,GPR183,TRIB1,MERTK,PF4,SNBNO2,CXCL16,HIF1A,DYSF,C1QC,ULBP2,HSD3B7,GM2A,CXCR1,RIPK1,MAP3K8,TNFRSF10D,FPR2,EPAS1,FFAR2,PDE4D,IL1B,HLA-DOA,C1QB,ICAM1,CD274,C1QA,HAMP,NIT2,LILRA5,ADAM9,SLC11A1,ENPP2,PPARG,IFI27,CEBPG,IL8,PRKCH,CD1C,C19orf59,LTA4H,GYG1,EREG,CD1E,C10orf54,C3                                                                                                                                                                                                                                                                 |
|                                                   | localization of cell                                                                                                                                                                                                                                                                                      | EDNRB,CD177,HDAC9,ANXA3,JUP,PDE4B,GPR97,THBS1,GPR183,TRIB1,MERTK,PF4,SNBNO2,CXCL16,HIF1A,DYSF,APEX1,ARID5B,HSD3B7,SLC22A16,CXCR1,SOD2,TNFRSF10D,FPR2,FFAR2,PDE4D,IL1B,ICAM1,SPOCK3,PTP4A3,CD274,ADAM9,ENPP2,GLUL,PPARG,NSMF,IL8,FGF13,TIMP1,EREG,C15orf38,C10orf54                                                                                                                                                                                                                                                                                                                                                                                                |
|                                                   | cell motility                                                                                                                                                                                                                                                                                             | EDNRB,CD177,HDAC9,ANXA3,JUP,PDE4B,GPR97,THBS1,GPR183,TRIB1,MERTK,PF4,SNBNO2,CXCL16,HIF1A,DYSF,APEX1,ARID5B,HSD3B7,SLC22A16,CXCR1,SOD2,TNFRSF10D,FPR2,FFAR2,PDE4D,IL1B,ICAM1,SPOCK3,PTP4A3,CD274,ADAM9,ENPP2,GLUL,PPARG,NSMF,IL8,FGF13,TIMP1,EREG,C15orf38,C10orf54                                                                                                                                                                                                                                                                                                                                                                                                |
|                                                   | cell migration                                                                                                                                                                                                                                                                                            | EDNRB,CD177,HDAC9,ANXA3,JUP,PDE4B,GPR97,THBS1,GPR183,TRIB1,MERTK,PF4,SNBNO2,CXCL16,HIF1A,DYSF,APEX1,ARID5B,HSD3B7,CXCR1,SOD2,TNFRSF10D,FPR2,FFAR2,PDE4D,IL1B,ICAM1,PTP4A3,CD274,ADAM9,ENPP2,GLUL,PPARG,NSMF,IL8,FGF13,TIMP1,C15orf38,C10orf54                                                                                                                                                                                                                                                                                                                                                                                                                     |
|                                                   | immune response                                                                                                                                                                                                                                                                                           | CLU,HP,CD177,CST7,ANXA3,IL1R2,JUP,PDE4B,PPBP,GPR97,SAMSN1,CR1,THBS1,LRG1,TREML1,GRAP2,IL1RAP,GPR183,PF4,SNBNO2,CXCL16,DYSF,C1QC,ULBP2,GM2A,CXCR1,RIPK1,FFAR2,FFAR2,PDE4D,IL1B,HLA-DOA,C1QB,ICAM1,CD274,C1QA,HAMP,NIT2,LILRA5,SLC11A1,ENPP2,PPARG,IFI27,CEBPG,PRKCH,CD1C,C19orf59,LTA4H,GYG1,EREG,CD1E,C3                                                                                                                                                                                                                                                                                                                                                          |
|                                                   | acute inflammatory response                                                                                                                                                                                                                                                                               | CLU,HP,EDNRB,CR1,C1QC,FFAR2,IL1B,C1QB,ICAM1,C1QA,HAMP,PPARG,C3                                                                                                                                                                                                                                                                                                                                                                                                                                                                                                                                                                                                    |
|                                                   | inflammatory response                                                                                                                                                                                                                                                                                     | CLU,HP,EDNRB,CST7,HDAC9,IL1R2,CR1,THBS1,NAMPT,IL1RAP,SNBNO2,HIF1A,C1QC,GHRL,FPR2,FFAR2,IL1B,C1QB,ICAM1,C1QA,HAMP,LILRA5,SLC11A1,PPARG,IL8,TIMP1,C3                                                                                                                                                                                                                                                                                                                                                                                                                                                                                                                |
|                                                   | response to stimulus                                                                                                                                                                                                                                                                                      | CLU,MCTP2,HP,AQP9,EDNRB,CD177,CST7,HDAC9,ANXA3,IL1R2,JUP,ABCA1,PDE4B,PPBP,GPR97,SAMSN1,CR1,MYL9,THBS1,NAMPT,LRG1,TREML1,GNG11,ACSL1,LITAF,SLA,GRAP2,LMNB1,IL1RAP,GPR183,GPR133,TRIB1,MERTK,ALPL,PF4,SNBNO2,SNBNO2,CXCL16,HIF1A,DYSF,APEX1,ARID5B,TGFA,C1QC,ARHGAP22,ULBP2,CHRNE,GHRL,LRRC70,HSD3B7,GM2A,CXCR1,RIPK1,SOD2,MAP3K8,TNFRSF10D,FPR2,EPAS1,FFAR2,PDE4D,IL1B,HLA-DOA,C1QB,ICAM1,PTP4A3,CD274,C1QA,HAMP,NIT2,LILRA5,MMRN1,ADAM9,SLC11A1,ENPP2,SDCBP2,GLUL,PPARG,EHD1,NSMF,IFI27,CEBPG,DHODH,IL8,PLK3,PRKCH,PLA2G16,MAP4K1,FGF13,CD1C,C19orf59,SLC25A6,CTNND1,LTA4H,GNG10,TIMP1,GYG1,SERPINB2,NGFRAP1,LGALS12,EREG,CD1E,RASSF4,ACTA2,PTGIR,HPGD,FAM129A,C3 |
|                                                   | response to external stimulus                                                                                                                                                                                                                                                                             | CLU,HP,EDNRB,CST7,ANXA3,IL1R2,JUP,ABCA1,PDE4B,PPBP,CR1,THBS1,NAMPT,LRG1,ACSL1,LITAF,GPR183,TRIB1,ALPL,PF4,SNBNO2,CXCL16,DYSF,C1QC,GHRL,HSD3B7,CXCR1,FPR2,FFAR2,PDE4D,IL1B,C1QB,ICAM1,C1QA,HAMP,LILRA5,ADAM9,SLC11A1,ENPP2,GLUL,PPARG,IFI27,DHODH,IL8,PLA2G16,SLC25A6,SERPINB2,ACTA2,PTGIR,HPGD,C3                                                                                                                                                                                                                                                                                                                                                                 |
|                                                   | leukocyte chemotaxis                                                                                                                                                                                                                                                                                      | EDNRB,PDE4B,THBS1,GPR183,PF4,DYSF,HSD3B7,CXCR1,FPR2,FFAR2,PDE4D,IL8                                                                                                                                                                                                                                                                                                                                                                                                                                                                                                                                                                                               |
| locomotion                                        | EDNRB,CD177,HDAC9,ANXA3,JUP,PDE4B,GPR97,THBS1,GPR183,TRIB1,MERTK,PF4,SNBNO2,CXCL16,HIF1A,DYSF,APEX1,ARID5B,GHRL,HSD3B7,SLC22A16,CXCR1,SOD2,TNFRSF10D,FPR2,FFAR2,PDE4D,IL1B,ICAM1,SPOCK3,PTP4A3,CD274,ADAM9,ENPP2,GLUL,PPARG,NSMF,IL8,FGF13,TIMP1,EREG,C15orf38,C10orf54                                   |                                                                                                                                                                                                                                                                                                                                                                                                                                                                                                                                                                                                                                                                   |
| cell surface receptor signaling pathway           | EDNRB,CD177,IL1R2,JUP,ABCA1,PDE4B,GPR97,CR1,THBS1,LRG1,ACSL1,GRAP2,LMNB1,IL1RAP,GPR133,TRIB1,MERTK,PF4,SNBNO2,CXCL16,HIF1A,ARID5B,TGFA,CHRNE,GHRL,CXCR1,RIPK1,SOD2,MAP3K8,TNFRSF10D,FPR2,FFAR2,PDE4D,IL1B,ICAM1,PTP4A3,CD274,ADAM9,PPARG,IFI27,IL8,PRKCH,CTNND1,TIMP1,SERPINB2,NGFRAP1,EREG,PTGIR,HPGD,C3 |                                                                                                                                                                                                                                                                                                                                                                                                                                                                                                                                                                                                                                                                   |
| response to lipopolysaccharide                    | EDNRB,ABCA1,PDE4B,LITAF,TRIB1,ALPL,SNBNO2,PDE4D,IL1B,ICAM1,HAMP,ADAM9,SLC11A1,IL8,PTGIR,HPGD                                                                                                                                                                                                              |                                                                                                                                                                                                                                                                                                                                                                                                                                                                                                                                                                                                                                                                   |
| cellular response to lipopolysaccharide           | EDNRB,ABCA1,PDE4B,LITAF,TRIB1,SNBNO2,PDE4D,IL1B,ICAM1,HAMP,ADAM9,IL8                                                                                                                                                                                                                                      |                                                                                                                                                                                                                                                                                                                                                                                                                                                                                                                                                                                                                                                                   |
| response to molecule of bacterial origin          | EDNRB,ABCA1,PDE4B,LITAF,TRIB1,ALPL,SNBNO2,PDE4D,IL1B,ICAM1,HAMP,ADAM9,SLC11A1,IL8,PTGIR,HPGD                                                                                                                                                                                                              |                                                                                                                                                                                                                                                                                                                                                                                                                                                                                                                                                                                                                                                                   |
| cellular response to molecule of bacterial origin | EDNRB,ABCA1,PDE4B,LITAF,TRIB1,SNBNO2,PDE4D,IL1B,ICAM1,HAMP,ADAM9,IL8                                                                                                                                                                                                                                      |                                                                                                                                                                                                                                                                                                                                                                                                                                                                                                                                                                                                                                                                   |
| leukocyte migration                               | EDNRB,CD177,PDE4B,THBS1,GPR183,MERTK,PF4,DYSF,HSD3B7,CXCR1,TNFRSF10D,FPR2,FFAR2,PDE4D,ICAM1,IL8                                                                                                                                                                                                           |                                                                                                                                                                                                                                                                                                                                                                                                                                                                                                                                                                                                                                                                   |
| response to oxygen-containing compound            | CLU,HP,AQP9,EDNRB,HDAC9,JUP,ABCA1,PDE4B,THBS1,NAMPT,ACSL1,LITAF,TRIB1,ALPL,SNBNO2,HIF1A,APEX1,GHRL,RIPK1,SOD2,FPR2,FFAR2,PDE4D,IL1B,ICAM1,HAMP,ADAM9,SLC11A1,GLUL,PPARG,NSMF,DHODH,IL8,PLK3,MAP4K1,TIMP1,ERE G,PTGIR,HPGD                                                                                 |                                                                                                                                                                                                                                                                                                                                                                                                                                                                                                                                                                                                                                                                   |
| cell activation                                   | CLU,HP,CD177,CST7,HDAC9,ANXA3,JUP,PPBP,GPR97,SAMSN1,CR1,MYL9,THBS1,NAMPT,LRG1,TREML1,GRAP2,GPR183,MERTK,PF4,SNBNO2,DYSF,ULBP2,GM2A,CXCR1,MAP3K8,FPR2,IL1B,HLA-DOA,ICAM1,CD274,C1QA,NIT2,LILRA5,ADAM9,SLC11A1,CEBPG,IL8,PRKCH,CD1C,C19orf59,LTA4H,TIMP1,GYG1,C10orf54,C3                                   |                                                                                                                                                                                                                                                                                                                                                                                                                                                                                                                                                                                                                                                                   |
| cell chemotaxis                                   | EDNRB,PDE4B,THBS1,GPR183,PF4,DYSF,HSD3B7,CXCR1,FPR2,FFAR2,PDE4D,IL8                                                                                                                                                                                                                                       |                                                                                                                                                                                                                                                                                                                                                                                                                                                                                                                                                                                                                                                                   |
| transmembrane signaling receptor activity         | EDNRB,IL1R2,ABCA1,CR1,IL1RAP,GPR183,GPR133,CXCR1,TNFRSF10D,FPR2,FFAR2,HLA-DOA,ICAM1,PPARG,TNFRSF10C,PTGIR,HPGD                                                                                                                                                                                            |                                                                                                                                                                                                                                                                                                                                                                                                                                                                                                                                                                                                                                                                   |
| receptor ligand activity                          | PPBP,NAMPT,PF4,CXCL16,TGFA,GHRL,IL1B,HAMP,IL8,FGF13,TIMP1                                                                                                                                                                                                                                                 |                                                                                                                                                                                                                                                                                                                                                                                                                                                                                                                                                                                                                                                                   |
| receptor regulatory activity                      | PPBP,NAMPT,PF4,CXCL16,TGFA,GHRL,IL1B,HAMP,IL8,FGF13,TIMP1                                                                                                                                                                                                                                                 |                                                                                                                                                                                                                                                                                                                                                                                                                                                                                                                                                                                                                                                                   |
| signaling receptor binding                        | CLU,EDNRB,CD177,ABCA1,PPBP,THBS1,NAMPT,LRG1,PF4,CXCL16,HIF1A,TGFA,ULBP2,GHRL,RIPK1,FPR2,PDE4D,IL1B,ICAM1,HAMP,ADAM9,PPARG,IL8,FGF13,CTNND1,TIMP1,NGFRAP1,EREG,C3                                                                                                                                          |                                                                                                                                                                                                                                                                                                                                                                                                                                                                                                                                                                                                                                                                   |
| signaling receptor activity                       | EDNRB,IL1R2,ABCA1,CR1,IL1RAP,GPR183,GPR133,CHRNE,CXCR1,TNFRSF10D,FPR2,FFAR2,HLA-DOA,ICAM1,PPARG,TNFRSF10C,PTGIR,HPGD                                                                                                                                                                                      |                                                                                                                                                                                                                                                                                                                                                                                                                                                                                                                                                                                                                                                                   |
| molecular transducer activity                     | EDNRB,IL1R2,ABCA1,CR1,IL1RAP,GPR183,CHRNE,CXCR1,TNFRSF10D,FPR2,FFAR2,HLA-DOA,ICAM1,PPARG,TNFRSF10C,PTGIR,HPGD                                                                                                                                                                                             |                                                                                                                                                                                                                                                                                                                                                                                                                                                                                                                                                                                                                                                                   |
| cytokine activity                                 | NAMPT,PF4,CXCL16,IL1B,IL8,TIMP1                                                                                                                                                                                                                                                                           |                                                                                                                                                                                                                                                                                                                                                                                                                                                                                                                                                                                                                                                                   |
| G protein-coupled receptor activity               | EDNRB,GPR183,GPR133,CXCR1,FPR2,FFAR2,PPARG,PTGIR,HPGD                                                                                                                                                                                                                                                     |                                                                                                                                                                                                                                                                                                                                                                                                                                                                                                                                                                                                                                                                   |
| chemokine activity                                | PF4,CXCL16,IL8                                                                                                                                                                                                                                                                                            |                                                                                                                                                                                                                                                                                                                                                                                                                                                                                                                                                                                                                                                                   |
| cytokine receptor binding                         | LRG1,PF4,CXCL16,RIPK1,IL1B,IL8,NGFRAP1                                                                                                                                                                                                                                                                    |                                                                                                                                                                                                                                                                                                                                                                                                                                                                                                                                                                                                                                                                   |
| growth factor activity                            | PPBP,TGFA,FGF13,TIMP1                                                                                                                                                                                                                                                                                     |                                                                                                                                                                                                                                                                                                                                                                                                                                                                                                                                                                                                                                                                   |
| amine transmembrane transporter activity          | AQP9,SLC22A16                                                                                                                                                                                                                                                                                             |                                                                                                                                                                                                                                                                                                                                                                                                                                                                                                                                                                                                                                                                   |
| chemokine receptor binding                        | PF4,CXCL16,IL8                                                                                                                                                                                                                                                                                            |                                                                                                                                                                                                                                                                                                                                                                                                                                                                                                                                                                                                                                                                   |
| calcium ion binding                               | MCTP2,ANXA3,MYL9,THBS1,PGS1,DYSF,TMEM2,MMRN1,ENPP2,EHD1                                                                                                                                                                                                                                                   |                                                                                                                                                                                                                                                                                                                                                                                                                                                                                                                                                                                                                                                                   |
| integrin binding                                  | CD177,THBS1,IL1B,ICAM1,ADAM9                                                                                                                                                                                                                                                                              |                                                                                                                                                                                                                                                                                                                                                                                                                                                                                                                                                                                                                                                                   |
| serine-type endopeptidase activity                | NA                                                                                                                                                                                                                                                                                                        |                                                                                                                                                                                                                                                                                                                                                                                                                                                                                                                                                                                                                                                                   |
| hemoglobin binding                                | HPR,HP                                                                                                                                                                                                                                                                                                    |                                                                                                                                                                                                                                                                                                                                                                                                                                                                                                                                                                                                                                                                   |
| interleukin-1 receptor activity                   | IL1R2,IL1RAP                                                                                                                                                                                                                                                                                              |                                                                                                                                                                                                                                                                                                                                                                                                                                                                                                                                                                                                                                                                   |
| G protein-coupled receptor binding                | EDNRB,PF4,CXCL16,GHRL,PDE4D,IL8,C3                                                                                                                                                                                                                                                                        |                                                                                                                                                                                                                                                                                                                                                                                                                                                                                                                                                                                                                                                                   |
| prostanoid receptor activity                      | PPARG,HPGD                                                                                                                                                                                                                                                                                                |                                                                                                                                                                                                                                                                                                                                                                                                                                                                                                                                                                                                                                                                   |
